# Supplementary material for: Incidence and Presenting Characteristics of Angiosarcoma in the US, 2001-2020
Source: PubMed Central journal article supplement (PMC11015348; doi:10.1001/jamanetworkopen.2024.6235), 2024-04-12

## Supplementary Online Content

Wagner MJ, Ravi V, Schaub SK, et al. Incidence and presenting characteristics of angiosarcoma in the US, 2001-2020. *JAMA Netw Open*. 2024;7(4):e246235.

doi:10.1001/jamanetworkopen.2024.6235

**eTable.** Demographics: All Patients With Available Data Included

**eFigure 1.** Demographic Features of Persons Presenting With Angiosarcoma in the US

**eFigure 2.** Age Distributions of Cutaneous and Visceral Angiosarcoma

**eFigure 3.** Extent of Disease at Diagnosis for Skin/Soft Tissue Angiosarcoma Based on Whether First Malignancy Diagnosed or Second/Greater Malignancy Diagnosed for Patient

**eFigure 4.** Angiosarcoma With Visceral Primary Sites: Distribution of Cases by Primary Site

This supplementary material has been provided by the authors to give readers additional information about their work.

**eTable.** Demographics: All Patients With Available Data Included

|                             |                                     | Total | Percent |
|-----------------------------|-------------------------------------|-------|---------|
| Age at dx<br>(n=19289)      | 0-9 years                           | 51    | 0.3     |
|                             | 10-19 years                         | 111   | 0.6     |
|                             | 20-29 years                         | 438   | 2.3     |
|                             | 30-39 years                         | 698   | 3.6     |
|                             | 40-49 years                         | 1267  | 6.6     |
|                             | 50-59 years                         | 2529  | 13.1    |
|                             | 60-69 years                         | 4209  | 21.8    |
|                             | 70-79 years                         | 5289  | 27.4    |
|                             | 80+ years                           | 4697  | 24.4    |
| Sex<br>(n=19289)            | Male                                | 8783  | 45.5    |
|                             | Female                              | 10506 | 54.5    |
| Race/ethnicity<br>(n=18731) | Non-Hispanic White                  | 14967 | 79.9    |
|                             | Black                               | 1622  | 8.7     |
|                             | American Indian/Alaska Native       | 93    | 0.5     |
|                             | Asian or Pacific Islander           | 644   | 3.4     |
|                             | Hispanic (All Races)                | 1405  | 7.5     |
| Primary site<br>(n=19289)   | Skin/soft tissue                    | 13955 | 72.3    |
|                             | Visceral                            | 4701  | 24.4    |
|                             | Unknown, not reported or suppressed | 633   | 3.3     |
| LRD stage<br>(n=16067)      | Localized                           | 8679  | 54.0    |
|                             | Regional, direct                    | 2649  | 16.5    |
|                             | Regional, nodal                     | 471   | 2.9     |
|                             | Regional, direct & nodal            | 282   | 1.8     |
|                             | Regional, NOS                       | 54    | 0.3     |
|                             | Distant                             | 3932  | 24.5    |

**eFigure 1. Demographic Features of Persons Presenting With Angiosarcoma in the US**

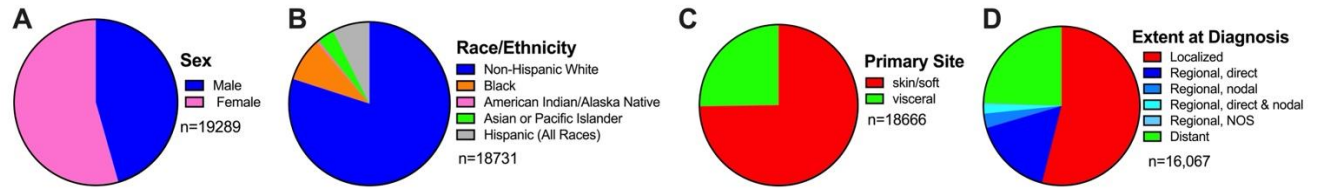

**eFigure 1: Demographic Features of Persons Presenting with Angiosarcoma in the US. A) Sex distribution (n=19,289) B) Race/Ethnicity distribution (n=18,731) C) Primary site (skin/soft tissue versus visceral; n=18,666) D) LRD stage (n=16,067). This is a visualization of data contained in eTable 1.**

**eFigure 2.** Age Distributions of Cutaneous and Visceral Angiosarcoma

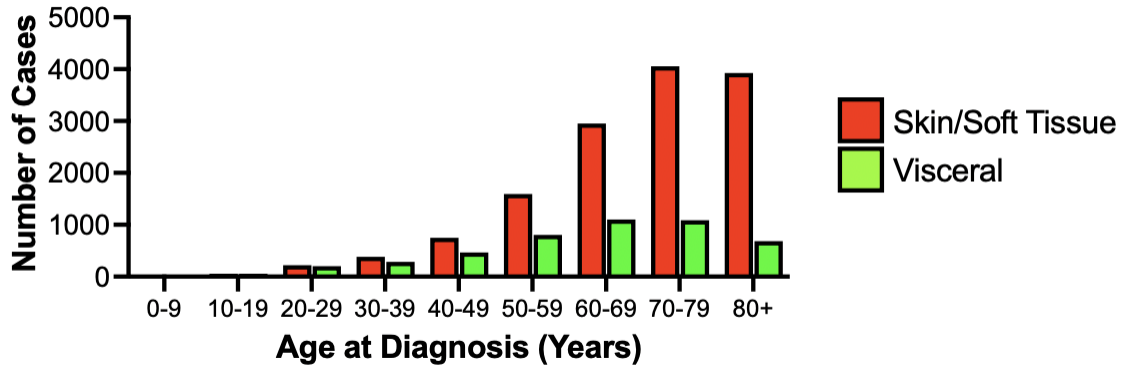

**eFigure 2. Age Distributions of Cutaneous and Visceral Angiosarcoma.** Age at diagnosis of angiosarcoma with skin/soft tissue primary (n=13955) and age at diagnosis of angiosarcoma with visceral primary (n=4697).

**eFigure 3.** Extent of Disease at Diagnosis for Skin/Soft Tissue Angiosarcoma Based on Whether First Malignancy Diagnosed or Second/Greater Malignancy Diagnosed for Patient

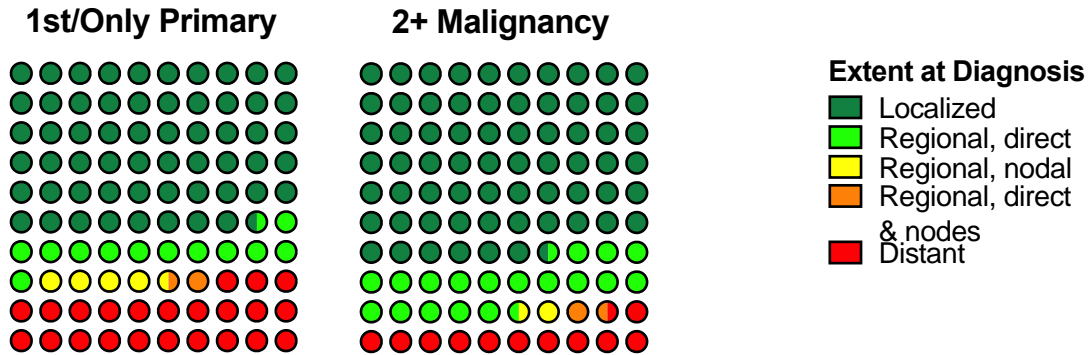

**eFigure 3.** Extent of disease at diagnosis for skin/soft tissue angiosarcoma based on whether first malignancy diagnosed or second/greater malignancy diagnosed for patient. N=6431 (first malignancy) and 5641 (second+ malignancy).

eFigure 4. Angiosarcoma With Visceral Primary Sites: Distribution of Cases by Primary Site

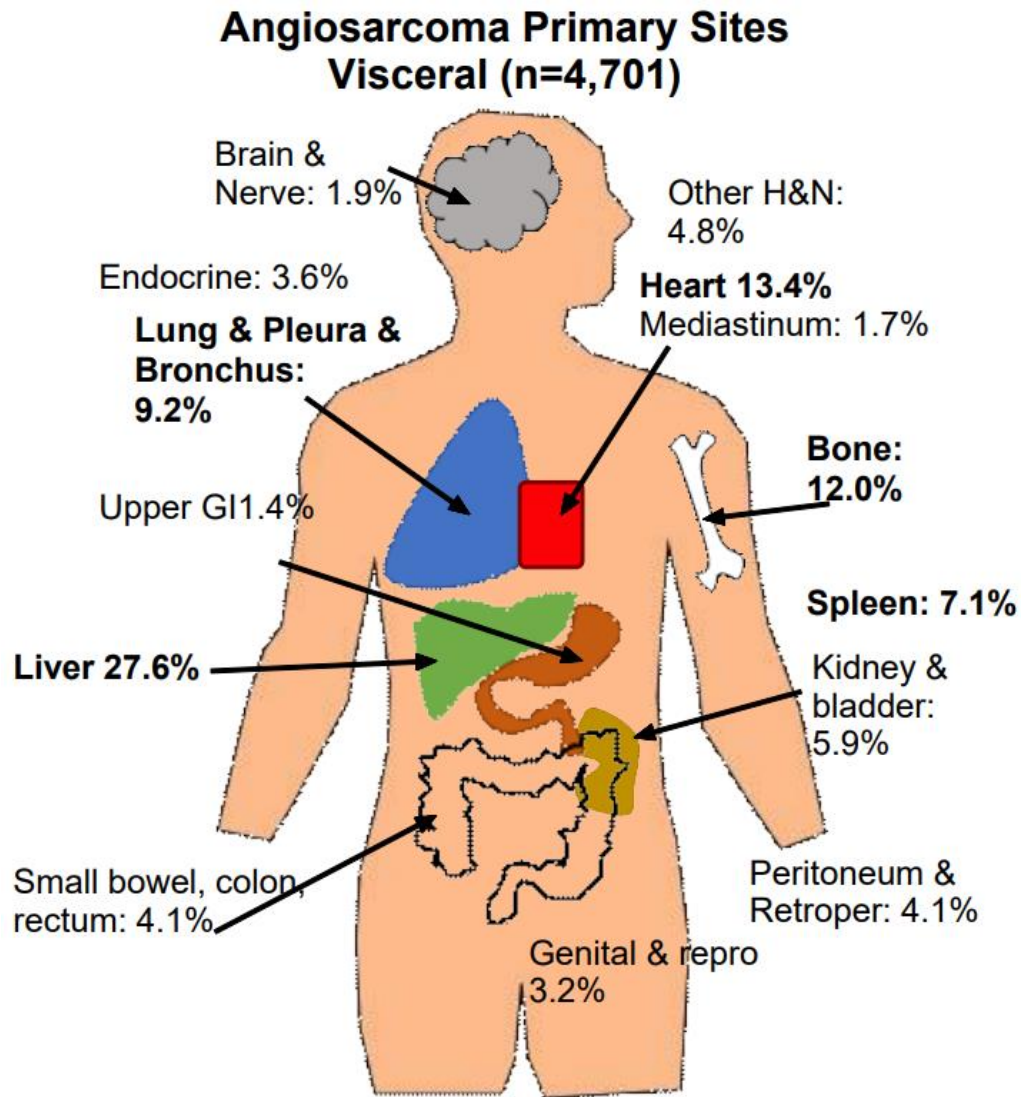

Supplement: jamanetwopen-e246235-s001.pdf [file jamanetwopen-e246235-s001.pdf]
