# Supplementary material for: Incidence and Presenting Characteristics of Angiosarcoma in the US, 2001-2020
Source: PubMed Central journal article supplement (PMC11015348; doi:10.1001/jamanetworkopen.2024.6235), 2024-04-12
Supplement: jamanetwopen-e246235-s002.pdf [file jamanetwopen-e246235-s002.pdf]

## Data Sharing Statement

Wagner. Incidence and Presenting Characteristics of Angiosarcoma in the US, 2001-2020. *JAMA Netw Open*. Published April 12, 2024. doi:10.1001/jamanetworkopen.2024.6235

### Data

**Data available:** Yes

**Data types:** Deidentified participant data, Other (please specify)

**Additional Information:** All data are publicly available through the U.S. Cancer Statistics (<https://www.cdc.gov/cancer/uscs/index.htm>)

**How to access data:** All data are publicly available through the U.S. Cancer Statistics (<https://www.cdc.gov/cancer/uscs/index.htm>)

**When available:** With publication

### Supporting Documents

**Document types:** None

### Additional Information

**Who can access the data:** All data are publicly available through the U.S. Cancer Statistics (<https://www.cdc.gov/cancer/uscs/index.htm>)

**Types of analyses:** Data are available for any purpose.

**Mechanisms of data availability:** All data are publicly available through the U.S. Cancer Statistics (<https://www.cdc.gov/cancer/uscs/index.htm>)
